# Supplementary material for: Defects lead to a massive enhancement in the UV-Vis-IR driven thermocatalytic activity of Co3O4 mesoporous nanorods
Source: Royal Society of Chemistry journal article supplement (doi:10.1039/c8ta01362d), 2018-01-01
Supplement: c8ta01362d1.pdf [file c8ta01362d1.pdf]

## Supporting information

### Defects lead to a massive enhancement in UV-Vis-IR driven thermocatalytic activity of $\text{Co}_3\text{O}_4$ mesoporous nanorods

Lan Lan, Zhengkang Shi, Qian Zhang, Yuanzhi Li,\* Yi Yang, Shaowen Wu, Xiujian Zhao

State Key Laboratory of Silicate Materials for Architectures (Wuhan University of Technology), 122

Luoshi Road, Wuhan 430070, P. R. China. Email: liyuanzhi66@hotmail.com

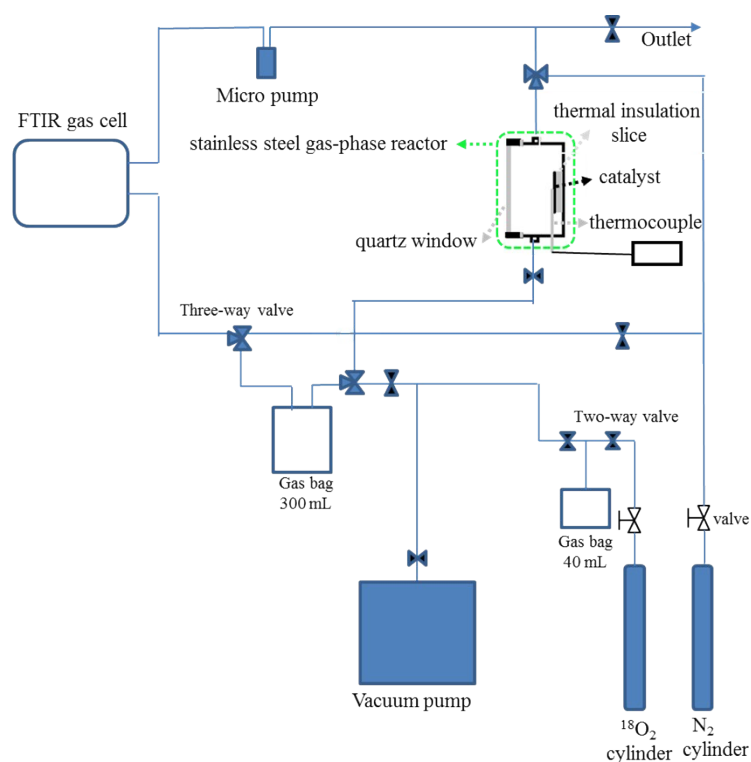

**Scheme S1.** The Set-up of isotope labeling experiment for the oxidation of benzene ( $^{12}\text{C}_6\text{H}_6$ ) by  $^{18}\text{O}_2$  on the  $\text{Co}_3\text{O}_4$ -MNR sample under the illumination from the Xe lamp.

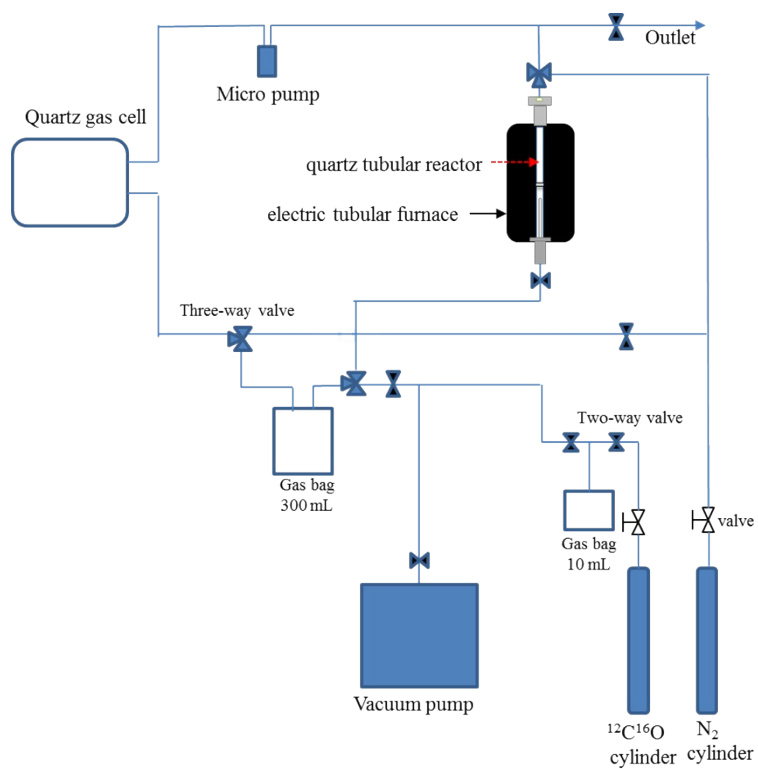

**Scheme S2.** The set-up for heating the used  $\text{Co}_3\text{O}_4\text{-MNR}$  sample (after the  $^{18}\text{O}_2$  isotope experiment) in an atmosphere of  $^{12}\text{C}^{16}\text{O}$  and  $\text{N}_2$  at a known heating rate.

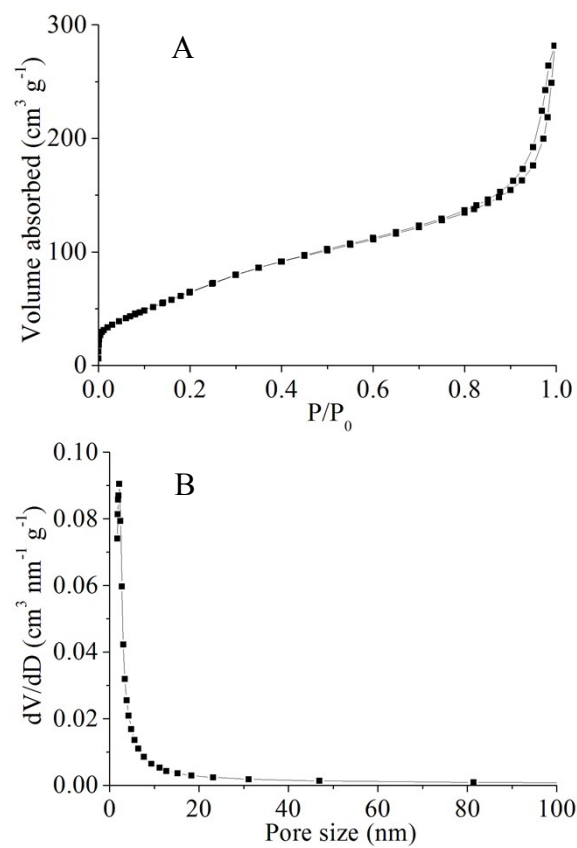

**Figure S1.** N<sub>2</sub> adsorption–desorption isotherm (A) and pore size distribution (B) of Co<sub>3</sub>O<sub>4</sub>-MNR.

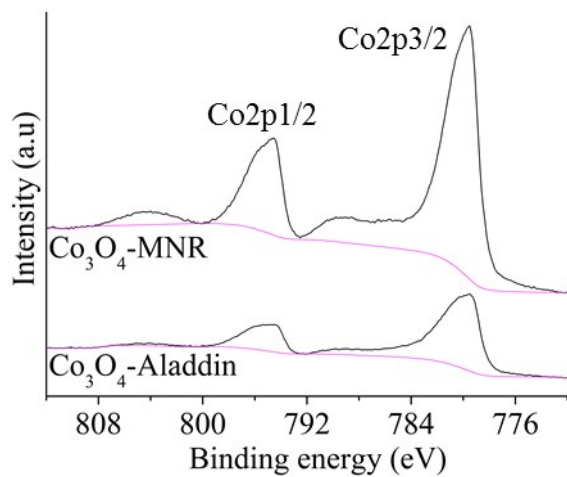

**Figure S2.** The XPS spectra of Co<sub>2</sub>p of the samples.

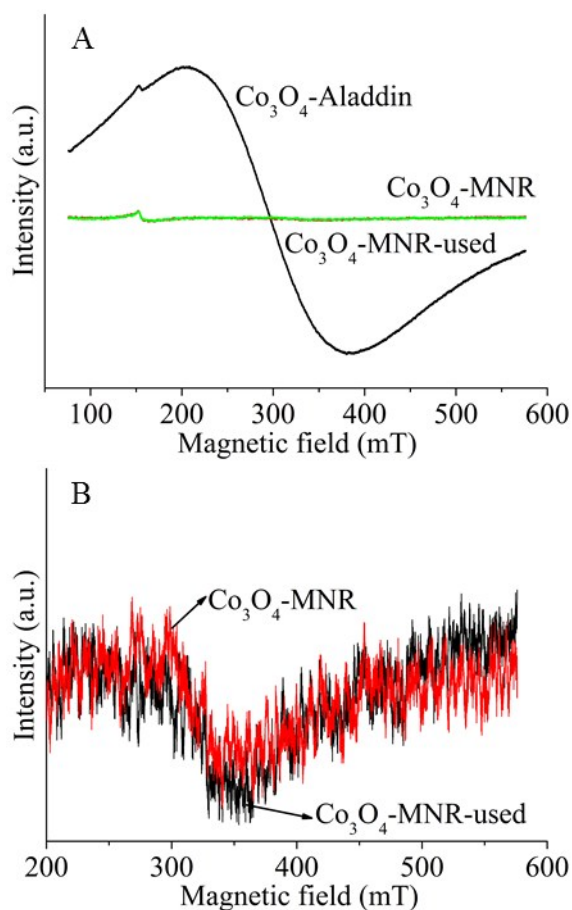

**Figure S3.** The EPR spectra of  $\text{Co}_3\text{O}_4$ -MNR,  $\text{Co}_3\text{O}_4$ -Aladdin, and the used  $\text{Co}_3\text{O}_4$ -MNR sample after the photothermocatalytic durability tests (A). The EPR spectra (enlarged from Figure S3A) of  $\text{Co}_3\text{O}_4$ -MNR and the used  $\text{Co}_3\text{O}_4$ -MNR sample after the photothermocatalytic durability tests (B): The values of  $g$  for  $\text{Co}_3\text{O}_4$ -Aladdin,  $\text{Co}_3\text{O}_4$ -MNR, and the used  $\text{Co}_3\text{O}_4$ -MNR sample after the photothermocatalytic durability tests are 2.185, 2.033, and 2.033 respectively.

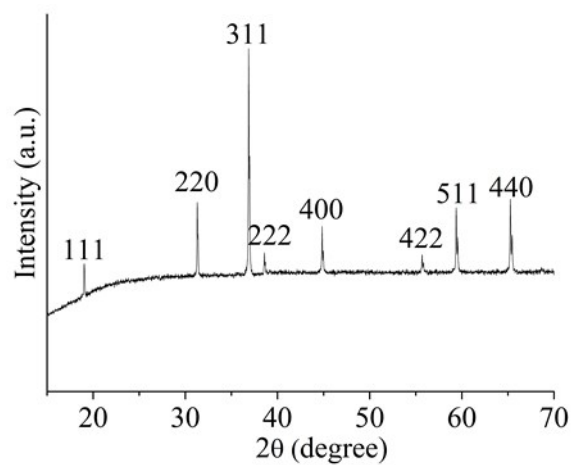

**Figure S4.** XRD patterns of the  $\text{Co}_3\text{O}_4$ -Aladdin sample.

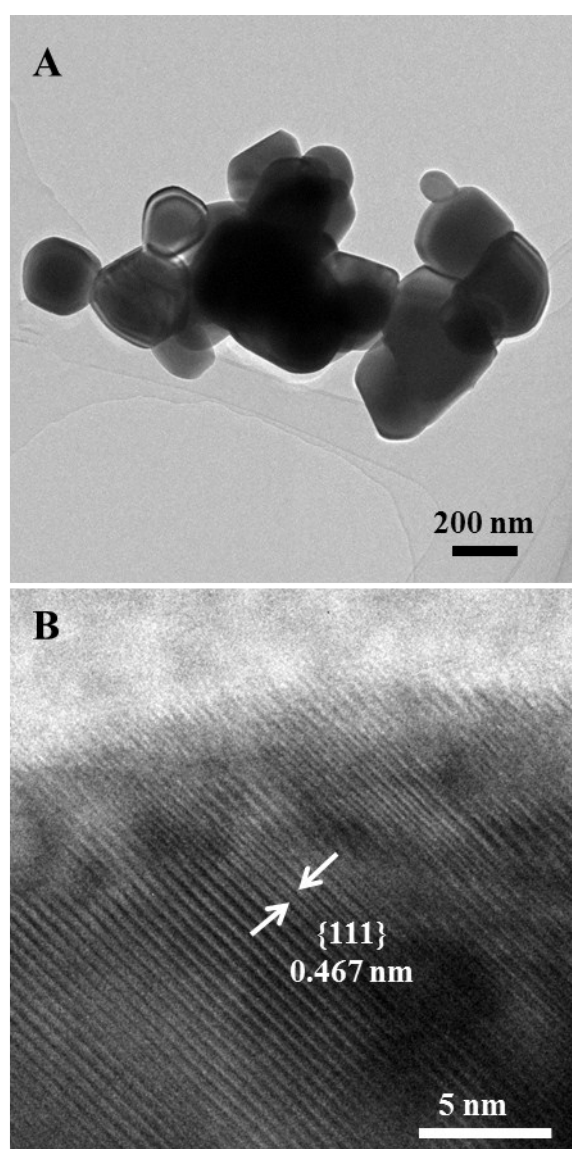

**Figure S5.** TEM (A) and HRTEM (B) images of the commercial  $\text{Co}_3\text{O}_4$ -Aladdin sample.

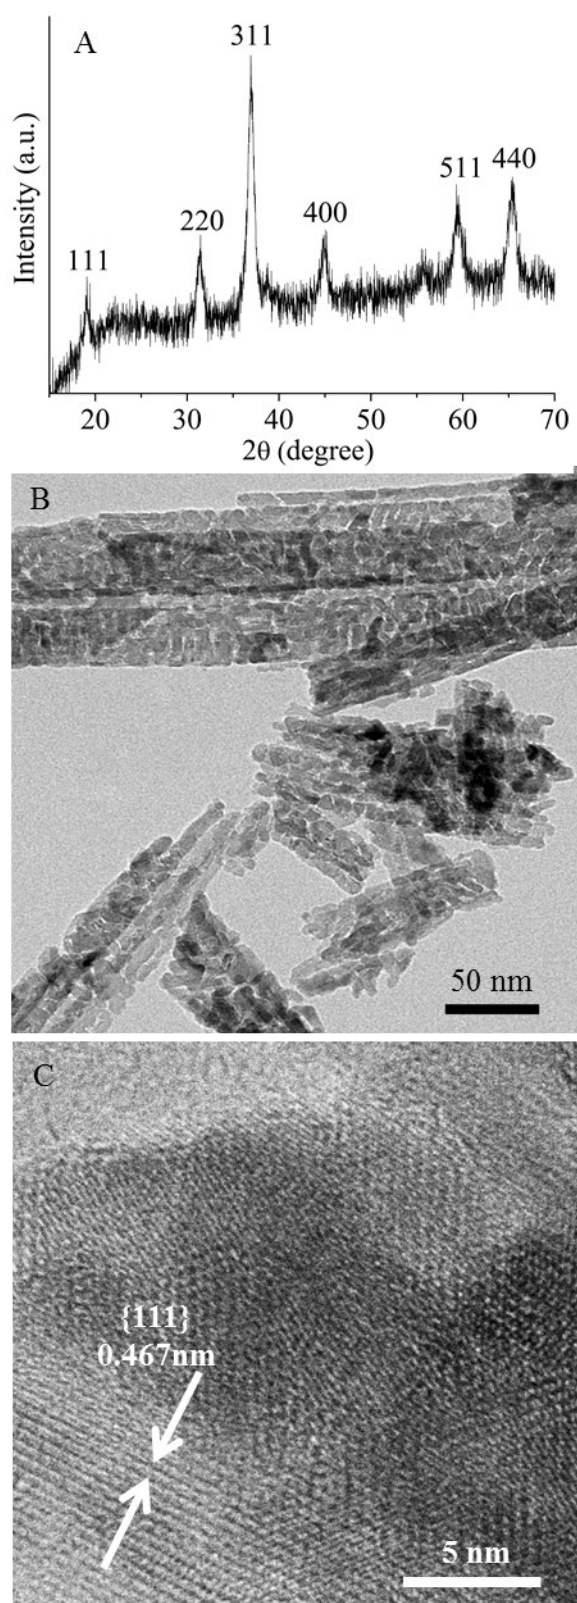

**Figure S6.** The XRD patterns (A), TEM (B), and HRTEM (C) of the used Co<sub>3</sub>O<sub>4</sub>-MNR sample after the photothermocatalytic durability tests.

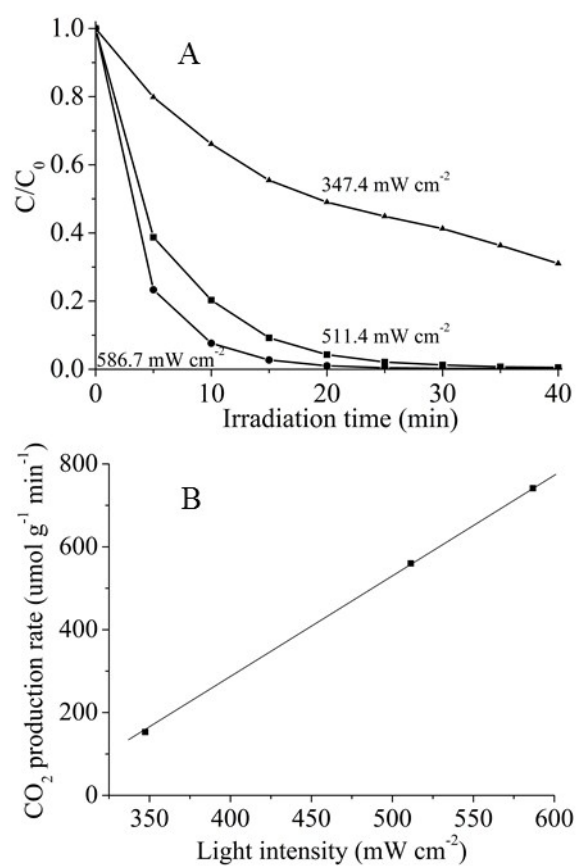

**Figure S7.** The time evolution of benzene concentration (A) and the initial  $\text{CO}_2$  production rate of  $\text{Co}_3\text{O}_4\text{-MNR}$  for benzene oxidation of under the UV-Vis-IR illumination with different light intensity.

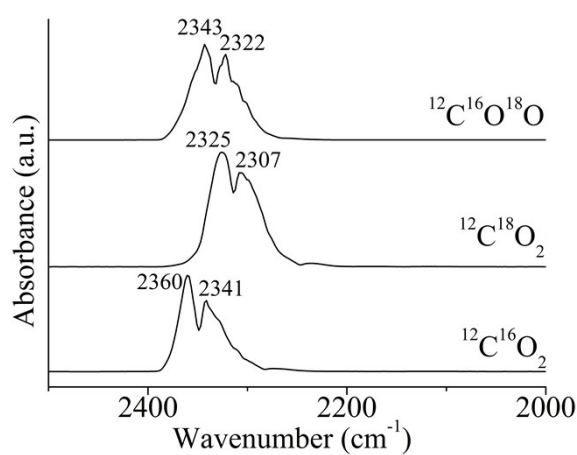

**Figure S8.** FTIR spectra of pure gases of  $^{12}\text{C}^{16}\text{O}_2$ ,  $^{12}\text{C}^{18}\text{O}_2$ , and  $^{12}\text{C}^{16}\text{O}^{18}\text{O}$  prepared by the oxidation of  $^{12}\text{C}^{16}\text{O}$  by  $^{18}\text{O}_2$  on 1.0 wt%  $\text{Pt}/\text{Al}_2\text{O}_3$ .

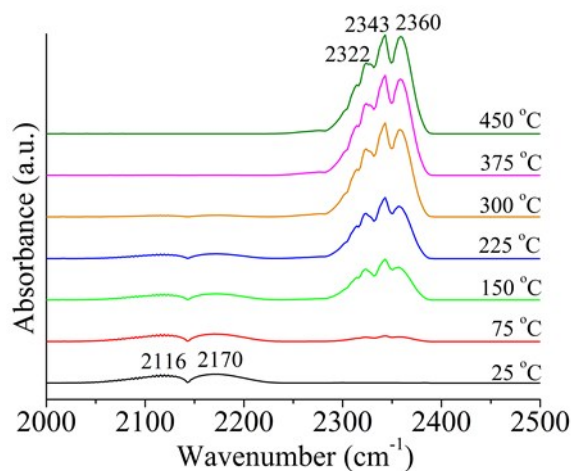

**Figure S9.** The evolution of FTIR spectra of the reactants and products for the used  $\text{Co}_3\text{O}_4$ -MNR sample (after the oxidation of benzene by  $^{18}\text{O}_2$  on the fresh  $\text{Co}_3\text{O}_4$ -MNR sample under the UV-Vis-IR illumination for 70 min) in an atmosphere of  $^{12}\text{C}^{16}\text{O}$  and  $\text{N}_2$  at elevated temperatures. As shown in Figure S9, when the temperature increases to 150 °C, the strong double peaks of  $^{12}\text{C}^{16}\text{O}^{18}\text{O}$  at 2343 and 2322  $\text{cm}^{-1}$  are observed. This observation indicates that a considerable amount of  $^{18}\text{O}$  exist in the used  $\text{Co}_3\text{O}_4$ -MNR sample and participate in the oxidation of  $^{12}\text{C}^{16}\text{O}$ . The strong peak of  $^{12}\text{C}^{16}\text{O}_2$  at 2360  $\text{cm}^{-1}$  (note: the peak at 2341  $\text{cm}^{-1}$  of  $^{12}\text{C}^{16}\text{O}_2$  overlaps with the peak at 2343  $\text{cm}^{-1}$  of  $^{12}\text{C}^{16}\text{O}^{18}\text{O}$ ) is observed. This observation indicate that a considerable amount of  $^{16}\text{O}$  also exist in the used  $\text{Co}_3\text{O}_4$ -MNR sample and participate in the oxidation of  $^{12}\text{C}^{16}\text{O}$ . When the temperature increases to 225 and 300 °C, the peaks of both  $^{12}\text{C}^{16}\text{O}^{18}\text{O}$  and  $^{12}\text{C}^{16}\text{O}_2$  are significantly intensified, suggesting that more lattice oxygens of  $^{16}\text{O}$  and  $^{18}\text{O}$  in the used  $\text{Co}_3\text{O}_4$ -MNR sample participate in the oxidation of  $^{12}\text{C}^{16}\text{O}$ . When the temperature further increases to 375 and 450 °C, the peak intensity of  $^{12}\text{C}^{16}\text{O}^{18}\text{O}$  at 2322  $\text{cm}^{-1}$  almost remains unchanged, while the peak of  $^{12}\text{C}^{16}\text{O}_2$  at 2360  $\text{cm}^{-1}$  is obviously intensified. This observation indicates that the lattice  $^{18}\text{O}$  in the used  $\text{Co}_3\text{O}_4$ -MNR sample is completely exhausted, and the bulk lattice  $^{16}\text{O}$  in the used  $\text{Co}_3\text{O}_4$ -MNR sample migrates to the surface and participates in the oxidation of  $^{12}\text{C}^{16}\text{O}$ .



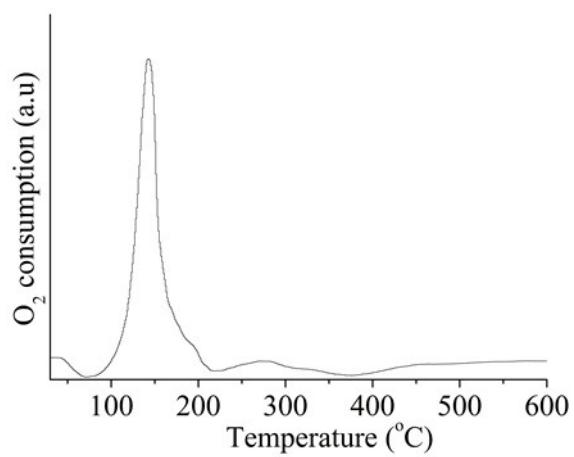

**Figure S10.**  $\text{O}_2$ -temperature programmed oxidation of the  $\text{Co}_3\text{O}_4$ -MNR sample pre-reduced by CO at 250 °C.
